# Supplementary material
Source: publisher figshare collection journal article supplement (https://sage.figshare.com/ndownloader/files/22826885)
Supplement: Supplementary file 1 [file 22826885]

## **Appendix**

The interview has four parts which explore four aspects of the young person's experience connected to decent work:

- 1) Perception of work in general (*What do they think of work as it is and of what should it be?*)
- 2) Their own work: description, evaluation and explanations (*What is their work? How do they consider it? Is it decent or not?*)
- 3) Their life narrative (*How did they come to that line of work? What are the main events that played a role? How do they see their future?*)
- 4) Their current identity and relation with other spheres of life (*How do they organize their life having this job with their other spheres of life? How do they wish their life could evolve?*)

These four aspects were explored using the open questions below.

### **1) Perceptions of work in general**

- In your opinion, how would you define work?
- What characteristics define a good work (e.g., some expectations of retribution and a work with some qualities)?
- What characteristics define a bad work (e.g., a work that brings problems in the relationships with others, a work that is bad for health, and a work that offers no equity)?
- Can you describe the kind of work you dream of? Can you explain why you dream of this work?
- What do you think work should be?

### **3) Your own current work**

- Describe your current work: activity, wage, health threat, social protection, social dialogue and free time.
- How would you evaluate the financial aspects of your work?
- How would you consider the social aspects of your work?
- How would you consider your autonomy and responsibility in your job?
- Describe a standard working day.
- What kind of difficulties do you meet in this work?
- What do you particularly like in this work?
- How do you wish to evolve professionally speaking?
- If you won the lottery or games of chance, would you remain in this work?
- Regarding the definition of decent work *“opportunities for work that is productive and delivers a fair income, security in the workplace and social protection for families, better prospects for personal development and social integration, freedom for people to express their concerns, organize and participate in the decisions that affect their lives and equality of opportunity and treatment for all women and men”*, to what extent do you consider you work as decent and why?

### **3) Life narratives**

- Explain your educational/school trajectory?
- Why have you stopped going to education or training?
- How did you start working for the first time?
- To what extent does your family play a role in your situation?
- Which people have played a particular role in your life?

#### **4) Their current identity**

- What are the most important things in your life now?
- How would you currently describe yourself?
- Are there other important activities in your life?
- What are the important things you would like to develop in the new few years?
- What kind of person would you like to become in the future?
- In your view, what could be done to improve your own situation?
